# Supplementary material for: Genome-wide Association Analysis Reveals a Novel QTL CsFS1 for Fruit Skin Color in Cucumber
Source: Research Square preprint supplement (doi:10.21203/rs.3.rs-578494/v2), 2022-01-18
Supplement: Supplementary file 1 [file 38d061752ff6cf5fa258c90a.xlsx]

## Sheet: Table S4
Supplementary Table 4 The information of primer in qRT-PCR.
Gene ID	Forward primer sequence (5’-3’)	Reverse primer sequence (5’-3’)
Csa3G912380	GGCAATATTTTGTTTCCAAGAACCC	CAGCAGCCTCATCCACCTCAGA
Csa3G912920	CTCCTCTTTGGCGTAATGGACCTC	CTTCATATTCATCGGGATCAGCCC
Csa3G914000	TCACTCCCTTGGCACGTCGTATTT	AGTGAAATTGACAAGAAACGCCTCC
