# Supplementary material for: Genome-wide Association Analysis Reveals a Novel QTL CsFS1 for Fruit Skin Color in Cucumber
Source: Research Square preprint supplement (doi:10.21203/rs.3.rs-578494/v2), 2022-01-18
Supplement: Supplementary file 2 [file 96e57ff92a2e55d438c19600.docx]

**Genome-wide association analysis reveals a novel QTL *CsFS1* for fruit skin color in cucumber**

Hongyu Huang1†, Qinqin Yang2†, Lidong Zhang1, Weiliang Kong1, Huizhe Wang3, Aimin Wei3, Shengli Du3, Ruihuan Yang3, Jiawang Li1, Tao Lin2, Xiaolin Geng2*, Yuhe Li3*

Xiaolin Geng

gengxlwahg@163.com

Yuhe Li

liyuhe@126.com

1 State Key Laboratory of Vegetable Germplasm Innovation, Tianjin Kernel Cucumber Research Institute, Tianjin 300192, China

2 China Agricultural University College of Horticulture, Beijing 100193, China

3 Institute of Cucumber Research, Tianjin Academy of Agricultural Sciences, Tianjin 300192, China

† Hongyu Huang and Qinqin Yang have contributed equally to this work.

*Corresponding authors

**Supplementary Information**

**Additional file 1: Figure S1.** Eight categories of fruit skin colors were defined to evaluate phenotypes of 289 cucumber accessions. **a** White, **b** Yellow-white, **c** White-green, **d** Yellow-green, **e** Light-green, **f** Green, **g** Dark-green, **h** Black-green.

**Additional file 2: Figure S2.** Relative expression of three candidate genes in fruit pericarp of the light-green near isogenic line NIL-1334 and the dark-green near isogenic line NIL-1325 at 0 days post-anthesis (DPA), 5 DPA, and 10 DPA. The relative expression is shown as the mean ± standard deviation, and statistical significance was determined using Student’s *t*-tests (**P* < 0.05).

**Additional file 3: Table S1.** QTL analysis of fruit skin color in the cucumber F2 population.

**Additional file 4: Table S2.** Information on 15 candidate genes between 39,531,980 and 39,626,163 bp on chromosome 3.

**Additional file 5: Table S3.** Information on 35 KASP SNP markers for QTL analysis.

**Additional file 6: Table S4.** Primers used in qRT-PCR.
